# Supplementary material
Source: Springer Nature journal article supplement (https://www.springermedizin.de/resource/supplementary/13018_2010_224_MOESM2_ESM.pdf/9636584)

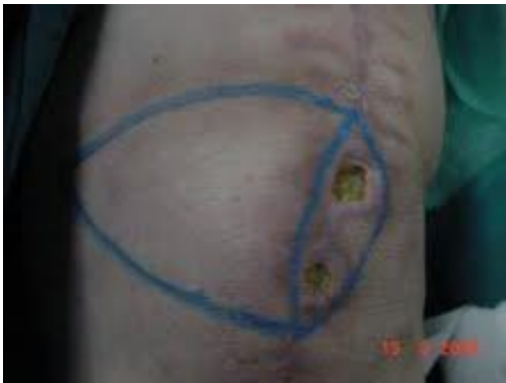

Supplement: MOESM2 [file 9636584]
